# Supplementary material
Source: ML conference proceedings conference paper supplement (https://openaccess.thecvf.com/content/CVPR2025/html/Xie_AdaDARE-gamma_Balancing_Stability_CVPR_2025_paper.html)
Supplement: Supplementary file 1 [file Xie_AdaDARE-gamma_Balancing_Stability_CVPR_2025_supplemental.pdf]

# AdaDARE- $\gamma$ : Balancing Stability and Plasticity in Multi-modal LLMs through Efficient Adaptation

## Supplementary Material

### A. Proof

#### A.1. Proof of Theorem 1

**Theorem 1** Consider the optimization problem of minimizing the expected layer-wise loss:

$$\arg \min_{P^\ell} \mathbb{E} \left[ \left\| \Theta_{\text{sft}}^\ell \mathcal{X}_T^\ell - \Theta_{\text{fusion}}^\ell \mathcal{X}_T^\ell \right\|_2^2 \right], \quad (\text{A.1})$$

subject to the constraints:

$$\frac{\sum_{i=1}^n p_i}{n} \geq p, \quad \text{and} \quad 0 \leq p_i < 1 \quad \forall i. \quad (\text{A.2})$$

where  $p$  represents the desired sparsity ratio. Then, the optimal probabilities  $p_i^*$  that minimize the expected loss are given by:

$$p_i^* = \max(0, 1 - \frac{n(1-p)\sqrt{H_{ii}\delta_i^2}}{\sum_{j=1}^n \sqrt{H_{jj}\delta_j^2}}) \quad \forall i. \quad (\text{A.3})$$

Here,  $H_{ii}$  represents the  $i$ -th diagonal element of the Hessian matrix, and  $\delta_i$  is the  $i$ -th element of  $\Delta\Theta^{\mathcal{T},\ell}$ .

*Proof.* First, we derive a simpler form of the loss function

$$\arg \min_{P^\ell} \mathbb{E} \left[ \left\| \Theta_{\text{sft}}^\ell \mathcal{X}_T^\ell - \Theta_{\text{fusion}}^\ell \mathcal{X}_T^\ell \right\|_2^2 \right], \quad (\text{A.4})$$

By leveraging that the gradient term at  $\Theta_{\text{sft}}^l$  equals zero, and  $\mathbb{E} [\Theta_{\text{sft},i}^l - \Theta_{\text{fusion},i}^l] = (1 - \gamma) \Delta\Theta_i^{\mathcal{T},\ell}$  is independent of  $p_i$ , we obtain:

$$\arg \min_{p_i} \mathbb{E} \left[ \sum_{i=1}^n H_{ii} (\Theta_{\text{sft},i}^l - \Theta_{\text{fusion},i}^l)^2 \right], \quad (\text{A.5})$$

To minimize Eq. (A.5) under the given constraints, we then compute the expected squared difference:

$$\begin{aligned} \mathcal{L} &= \mathbb{E} \left[ \sum_{i=1}^n H_{ii} (\Theta_{\text{sft},i}^l - \Theta_{\text{fusion},i}^l)^2 \right] \\ &= \sum_{i=1}^n H_{ii} \left[ (1 - p_i) \delta_i^2 \left( \frac{\gamma - (1 - p_i)}{1 - p_i} \right)^2 + p_i \delta_i^2 \right] \\ &= \sum_{i=1}^n H_{ii} \delta_i^2 \left( \frac{\alpha^2 + 2\alpha p_i + p_i^2}{1 - p_i} + p_i \right) \end{aligned} \quad (\text{A.6})$$

where we denote  $\alpha = \gamma - 1$  for simplicity. To solve this constrained optimization problem, we construct the Lagrangian:

$$\begin{aligned} \mathcal{L} &= \sum_{i=1}^n H_{ii} \delta_i^2 \left( \frac{\alpha^2 + 2\alpha p_i + p_i^2}{1 - p_i} + p_i \right) + \\ &\quad \lambda \left( p - \frac{1}{n} \sum_{i=1}^n p_i \right) - \sum_{i=1}^n \mu_i p_i, \end{aligned} \quad (\text{A.7})$$

where  $\lambda \geq 0$ ,  $\mu_i \geq 0$  are the Lagrange multipliers for the sparsity, non-negativity constraint respectively. By deriving the KKT conditions:

Stationarity Condition for each  $i$ :

$$H_{ii} \delta_i^2 \phi'(p_i) - \frac{\lambda}{n} - \mu_i = 0 \quad (\text{A.8})$$

where:

$$\begin{aligned} \phi'(p_i) &= \frac{d}{dp_i} \left[ \frac{(\alpha + p_i)^2}{1 - p_i} + p_i \right] \\ &= \frac{2(\alpha + p_i)(1 - p_i) + (\alpha + p_i)^2}{(1 - p_i)^2} \\ &= \frac{(\alpha + 1)^2}{(1 - p_i)^2} \\ &= \frac{\gamma^2}{(1 - p_i)^2} \end{aligned} \quad (\text{A.9})$$

Complementary Slackness:

$$\mu_i p_i = 0. \quad (\text{A.10})$$

Primal and Dual Feasibility:

$$0 \leq p_i < 1, \lambda \geq 0, \mu_i \geq 0. \quad (\text{A.11})$$

For the case where  $p_i > 0$  (thus  $\mu_i = 0$ ), we have:

$$\frac{H_{ii} \delta_i^2 \gamma^2}{1 - p_i^2} = \frac{\lambda}{n} \quad (\text{A.12})$$

This yields:

$$p_i = 1 - \sqrt{\frac{n H_{ii} \delta_i^2 \gamma^2}{\lambda}} \quad (\text{A.13})$$

Applying the sparsity constraint:

$$\sum_{i=1}^n (1 - p_i) = n(1 - p). \quad (\text{A.14})$$

and substituting  $1 - p_i$ :

$$\sum_{i=0}^n 1 - \sqrt{\frac{n H_{ii} \delta_i^2 \gamma^2}{\lambda}} = n(1 - p). \quad (\text{A.15})$$

We can solve for  $\lambda$ :

$$\begin{aligned} \sqrt{\lambda} &= \gamma \frac{\sum_{i=1}^n \sqrt{H_{ii} \delta_i^2}}{n(1 - p)} \sqrt{n}, \\ \lambda &= n \gamma^2 \left( \frac{\sum_{i=1}^n \sqrt{H_{ii} \delta_i^2}}{n(1 - p)} \right)^2 \end{aligned} \quad (\text{A.16})$$

Substituting  $\lambda$  back, we have:

$$p_i = 1 - \frac{n(1 - p) \sqrt{H_{ii} \delta_i^2}}{\sum_{j=1}^n \sqrt{H_{jj} \delta_j^2}}. \quad (\text{A.17})$$

and enforcing non-negativity finally yields the optimal solution:

$$p_i^* = \max \left( 0, 1 - \frac{n(1 - p) \sqrt{H_{ii} \delta_i^2}}{\sum_{j=1}^n \sqrt{H_{jj} \delta_j^2}} \right). \quad (\text{A.18})$$

## A.2. Proof of Theorem 2

**Theorem 2** Given the constraint  $\mathbb{E} \left[ \|\Theta_{\text{fusion}}^\ell - \Theta_{\text{pre}}^\ell\|_1 \right] < \eta$ , there exists an upper bound for  $\gamma$ :

$$\gamma \leq \frac{\eta}{\sum_{i=1}^n |\delta_i|}, \quad (\text{A.19})$$

where  $\delta_i$  represents the  $i$ -th element of the delta parameters  $\Delta \Theta^{\mathcal{T}, \ell}$ .

*Proof.* Let us expand the expected L1 norm:

$$\begin{aligned} &\mathbb{E} \left[ \|\Theta_{\text{fusion}}^\ell - \Theta_{\text{pre}}^\ell\|_1 \right] \\ &= \mathbb{E} \left[ \sum_{i=1}^n |\Theta_{\text{fusion}, i}^\ell - \Theta_{\text{pre}, i}^\ell| \right] \\ &= \sum_{i=1}^n \mathbb{E} [|\Theta_{\text{fusion}, i}^\ell - \Theta_{\text{pre}, i}^\ell|] \\ &= \sum_{i=1}^n \left| p_i \Theta_{\text{pre}, i}^\ell + (1 - p_i) \left( \Theta_{\text{pre}, i}^\ell + \frac{\gamma}{1 - p_i} \delta_i \right) - \Theta_{\text{pre}, i}^\ell \right| \\ &= \sum_{i=1}^n |\gamma \delta_i| \end{aligned} \quad (\text{A.20})$$

Given the constraint, we have:

$$\gamma \leq \frac{\eta}{\sum_{i=1}^n |\delta_i|} \quad (\text{A.21})$$
